# Supplementary material
Source: PubMed Central journal article supplement (PMC6261420)
Supplement: NIHMS982819-supplement-Supplemental_Appendix.pdf [file NIHMS982819-supplement-Supplemental_Appendix.pdf]

**Sorting, Based on the 1970 Dictionary of Occupational Titles**

| VARIABLES                    | (1)<br>1975<br>Earnings   | (2)<br>1975<br>Earnings    | (3)<br>1975<br>Earnings  | (4)<br>1975<br>Earnings    | (5)<br>1975<br>Earnings    |
|------------------------------|---------------------------|----------------------------|--------------------------|----------------------------|----------------------------|
| Beauty (standardized)        | 0.022***<br>(0.006)       | 0.022***<br>(0.006)        | 0.023***<br>(0.006)      | 0.022***<br>(0.006)        | 0.022***<br>(0.006)        |
| Worker functions - People    | 0.008**<br>(0.004)        |                            |                          |                            |                            |
| Beauty*People                | <b>-0.005*</b><br>(0.003) |                            |                          |                            |                            |
| GED Language development     |                           | 0.029***<br>(0.007)        |                          |                            |                            |
| Beauty*GED Language          |                           | <b>-0.011**</b><br>(0.005) |                          |                            |                            |
| GED Mathematical development |                           |                            | 0.034***<br>(0.007)      |                            |                            |
| Beauty*GED Math              |                           |                            | <b>-0.006</b><br>(0.005) |                            |                            |
| Verbal aptitude              |                           |                            |                          | 0.040***<br>(0.010)        |                            |
| Beauty*Verbal aptitude       |                           |                            |                          | <b>-0.017**</b><br>(0.007) |                            |
| Intelligence aptitude        |                           |                            |                          |                            | 0.050***<br>(0.011)        |
| Beauty*Intelligence aptitude |                           |                            |                          |                            | <b>-0.017**</b><br>(0.008) |
| Constant                     | 10.059***<br>(0.061)      | 10.065***<br>(0.060)       | 10.067***<br>(0.060)     | 10.069***<br>(0.061)       | 10.073***<br>(0.060)       |
| Observations                 | 2413                      | 2402                       | 2402                     | 2402                       | 2402                       |
| R-squared                    | 0.288                     | 0.292                      | 0.293                    | 0.291                      | 0.293                      |

Standard errors in parentheses  
\*\*\* p<0.01, \*\* p<0.05, \* p<0.1

Note 1. Exclusions same as in Table 1. Includes covariates from column 3 of Table 1, but with no industry dummies.

Note 2. We chose five DOT characteristics for our analysis: function scale for People, General Educational Development scales for Language and Mathematics, and Verbal and Intelligence aptitude factors. Rather than using the population aggregates (ICPSR 7845 Part II), we used the Current Population Survey from April 1971 augmented with DOT characteristics (ICPSR 7845 Part I) and constructed our own aggregates for a subsample that more closely matches the population in our analysis. Namely, we limited the CPS sample to white males, ages 28-45 that were employed and graduated from high school. The group means for our CPS subsample were calculated over the linking variable ABCODE, which is a combination of occupation and industry codes. We constructed the ABCODE variable in the WLS data following the description in Appendix A of the ICPSR codebook.

### Quintile Regressions

| VARIABLES         | (1)<br>1975 Earnings | (2)<br>1992 Earnings | (3)<br>1975 Earnings<br>(many covariates) | (4)<br>1992 Earnings<br>(many covariates) |
|-------------------|----------------------|----------------------|-------------------------------------------|-------------------------------------------|
| Beauty quintile 1 | -0.012<br>(0.018)    | -0.013<br>(0.034)    | -0.018<br>(0.017)                         | -0.041<br>(0.030)                         |
| Beauty quintile 2 | -0.042**<br>(0.018)  | -0.032<br>(0.034)    | -0.035**<br>(0.017)                       | -0.065**<br>(0.030)                       |
| Beauty quintile 4 | 0.013<br>(0.018)     | 0.031<br>(0.034)     | 0.007<br>(0.017)                          | -0.006<br>(0.030)                         |
| Beauty quintile 5 | 0.032*<br>(0.019)    | 0.071**<br>(0.034)   | 0.030*<br>(0.017)                         | 0.029<br>(0.031)                          |
| IQ score (std)    | 0.107***<br>(0.006)  | 0.170***<br>(0.011)  | 0.050***<br>(0.006)                       | 0.071***<br>(0.011)                       |
| Constant          | 10.621***<br>(0.013) | 10.634***<br>(0.024) | 10.018***<br>(0.090)                      | 9.594***<br>(0.201)                       |
| Observations      | 2703                 | 2262                 | 2445                                      | 1978                                      |
| R-squared         | 0.122                | 0.103                | 0.309                                     | 0.360                                     |

Standard errors in parentheses  
 \*\*\* p<0.01, \*\* p<0.05, \* p<0.1
